# Supplementary material for: Increased Ascorbate Biosynthesis Does Not Improve Nitrogen Fixation Nor Alleviate the Effect of Drought Stress in Nodulated Medicago truncatula Plants
Source: Front Plant Sci. 2021 Jun 28;12:686075. doi: 10.3389/fpls.2021.686075 (PMC8273863; doi:10.3389/fpls.2021.686075)
Supplement: Supplementary Table 1 — List of primers for used for qPCR analysis. [file Table_1.XLSX]

## Sheet: Sheet1
Supp. Table 1. List of primers used for qPCR analysis
	Gene name	Gene ID	Left primer	Right primer
	VTC2	Medtr5g093390	5'-AAGCCATTGCCTTAACTG	5'-TCAACCAGACATAATTCAGC
	Polypyrimidine tract-binding-like (PTB)	Medtr3g090960	5′-CGCCTTGTCAGCATTGATGTC	5′-TGAACCAGTGCCTGGAATCCT
